# Supplementary material for: Alcohol–alkali hydrolysis for high-throughput PET waste electroreforming-assisted green hydrogen generation
Source: Royal Society of Chemistry journal article supplement (doi:10.1039/d3ta05522a), 2024-01-01
Supplement: d3ta05522a1.pdf [file d3ta05522a1.pdf]

## Electronic Supplementary Material

### Alcohol-Alkali Hydrolysis for High-Throughput PET Waste Electroreforming-Assisted Green Hydrogen Generation

Ying Li,<sup>ab</sup> Li Quan Lee,<sup>c</sup> Hu Zhao,<sup>c</sup> Yunxing Zhao,<sup>b</sup> Pingqi Gao,<sup>\*bd</sup> and  
Hong Li<sup>\*c</sup>

<sup>a</sup> College of Energy Engineering, Xi'an University of Science and Technology, Xi'an  
710054, China

<sup>b</sup> School of Materials, Institute for Solar Energy Systems, Shenzhen Campus of Sun  
Yat-sen University, No. 66, Gongchang Road, Shenzhen, Guangdong 518107, China,

<sup>c</sup> School of Mechanical and Aerospace Engineering, Nanyang Technological  
University, 639798, Singapore.

<sup>d</sup> Sun Yat-sen University (Taizhou) Solar energy Joint R&D Center, Taizhou, 225300,  
China

\* Corresponding authors.

E-mail addresses: gaopq3@mail.sysu.edu.cn (P. Gao), ehongli@ntu.edu.sg (H. Li),

## 1. Experimental

### 1.1 The synthesis of Fe, Co co-modified Ni<sub>2</sub>P nanosheets on Ni foam (FeCo-Ni<sub>2</sub>P/NF)

To produce FeCo-Ni<sub>2</sub>P/NF nanosheets, 0.1 g cobaltous nitrate hexahydrate (Co(NO<sub>3</sub>)<sub>2</sub>·6H<sub>2</sub>O), 0.02 g ferric nitrate nonahydrate (Fe(NO<sub>3</sub>)<sub>3</sub>·9H<sub>2</sub>O), 0.5 g ammonium chloride (NH<sub>4</sub>Cl) and 5 mL water were mixed to obtain a uniform solution. And then 1\*1 cm nickel foam (NF) was immersed into the uniform solution and 1 g urea (CO(NH<sub>2</sub>)<sub>2</sub>) was added. The solution was then heated at 50 °C for 10 h, obtaining Fe, Co co-modified layered nickel hydroxide precursor on NF [termed as Fe<sub>1</sub>Co<sub>5</sub>-Ni(OH)<sub>2</sub>/NF].

Next, a piece of Fe<sub>1</sub>Co<sub>5</sub>-Ni(OH)<sub>2</sub>/NF was placed in one combustion boat and the other combustion boat containing 0.05 g sodium hypophosphite (NaH<sub>2</sub>PO<sub>2</sub>·H<sub>2</sub>O) was located at upstream of a tube furnace and then heated at 300 °C for 2 h with a flow of argon. Finally, the Fe<sub>1</sub>Co<sub>5</sub>-Ni<sub>2</sub>P/NF catalyst was obtained after being cooled down to room temperature naturally.

The Fe<sub>1</sub>Co<sub>10</sub>-Ni<sub>2</sub>P/NF, Fe<sub>1</sub>Co<sub>2</sub>-Ni<sub>2</sub>P/NF and Ni<sub>2</sub>P/NF were obtained according to similar hydrothermal and phosphating treatment method, expect for adding different amounts of Co(NO<sub>3</sub>)<sub>2</sub>·6H<sub>2</sub>O and Fe(NO<sub>3</sub>)<sub>3</sub>·9H<sub>2</sub>O.

### 1.2 Electrochemical characterizations

The electrooxidation process and HER measurement were performed with in a typical three-electrode system at 30 ± 1 °C. Thereinto, Ag/AgCl electrode acted as reference electrode, carbon rod acted as counter electrode, and the electrocatalyst

supported on NF was used as working electrode. According to the equation  $E_{\text{RHE}} = E_{\text{Ag/AgCl}} + 0.197 \text{ V} + 0.0591 \text{ pH}$ , all electrode potentials have been calibrated as reversible hydrogen electrode (RHE). Accurately measurement indicated that the loading of FeCo-Ni<sub>2</sub>P/NF on NF was about 1.2 mg cm<sup>-2</sup>.

In addition, the Faradaic efficiency (FE) for the PET electrooxidation to formic acid is determined by Equation:  $FE = (3Fn)/Q$ , where F is Faraday's constant (96485 C mol<sup>-1</sup>), Q is the total charge passed across the electrode during electrolysis, and n represents the moles of the formic acid produced.

## 2. Supplementary Figures

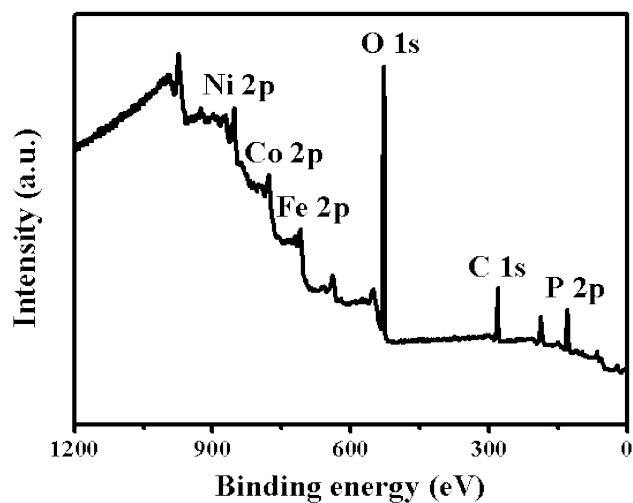

**Fig. S1.** The XPS spectra of FeCo-Ni<sub>2</sub>P/NF.

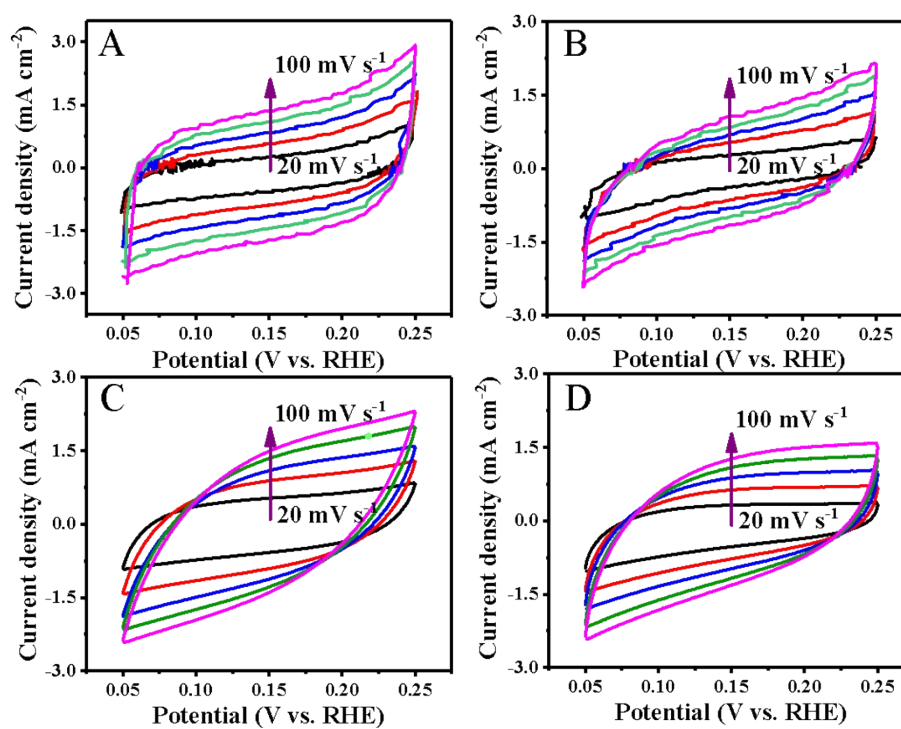

**Fig. S2.** curves of (A) Fe<sub>1</sub>Co<sub>5</sub>-Ni<sub>2</sub>P/NF, (B) FeCo-Ni(OH)<sub>2</sub>/NF, (C) Fe<sub>1</sub>Co<sub>2</sub>-Ni<sub>2</sub>P/NF and (D) Fe<sub>1</sub>Co<sub>10</sub>-Ni<sub>2</sub>P/NF in 1 M NaOH electrolyte at different scan rates.

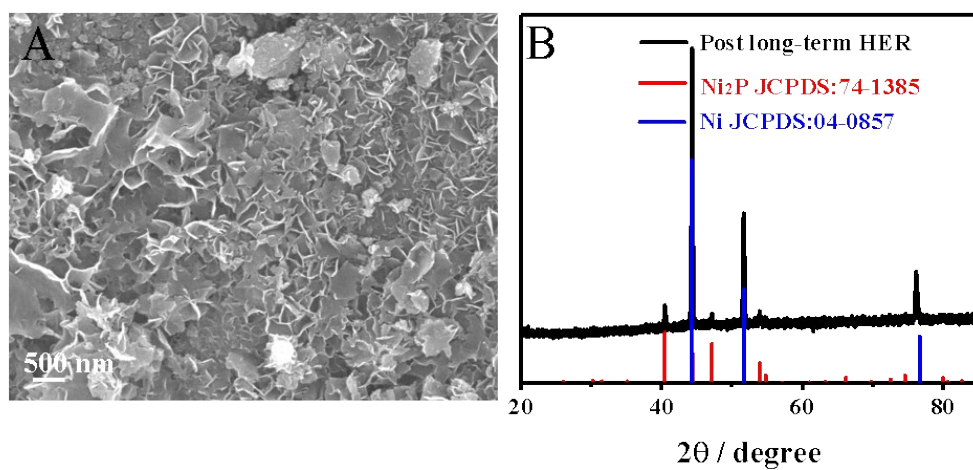

**Fig. S3.** (A) the SEM image, (B) XRD pattern of the Fe<sub>1</sub>Co<sub>5</sub>-Ni<sub>2</sub>P/NF after a long-term HER reaction.

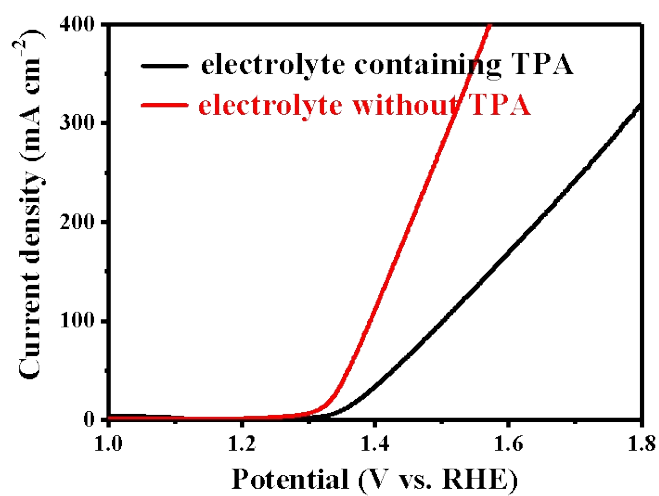

**Fig. S4.** Electrochemical activity tests of Fe<sub>1</sub>Co<sub>5</sub>-Ni<sub>2</sub>P/NF in electrolytes with and without TPA.

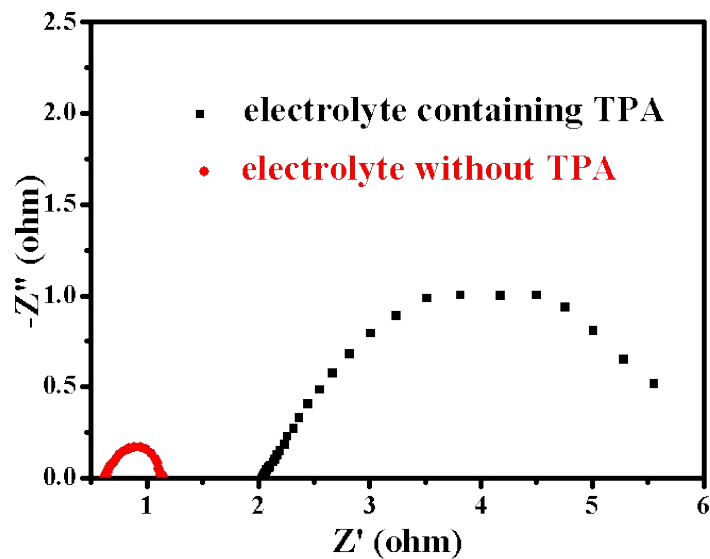

**Fig. S5.** Electrochemical impedance spectroscopy of  $\text{Fe}_1\text{Co}_5\text{-Ni}_2\text{P/NF}$  in electrolytes with and without TPA at 1.35 V vs. RHE.

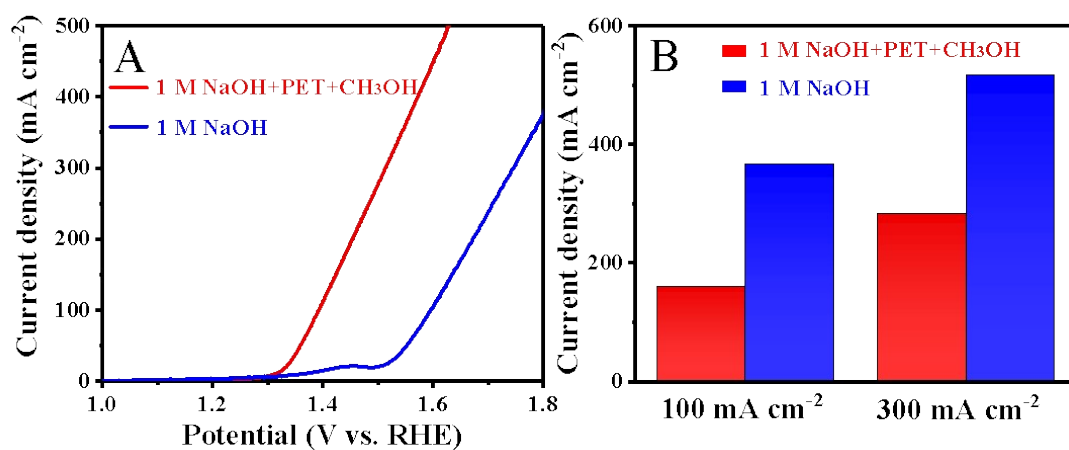

**Fig. S6.** (A) Electrochemical activity tests of  $\text{Fe}_1\text{Co}_5\text{-Ni}_2\text{P/NF}$  in different electrolytes. (B) Comparison of the overpotential of the  $\text{Fe}_1\text{Co}_5\text{-Ni}_2\text{P/NF}$  electrocatalyst at current densities of 100 and 300  $\text{mA cm}^{-2}$ .

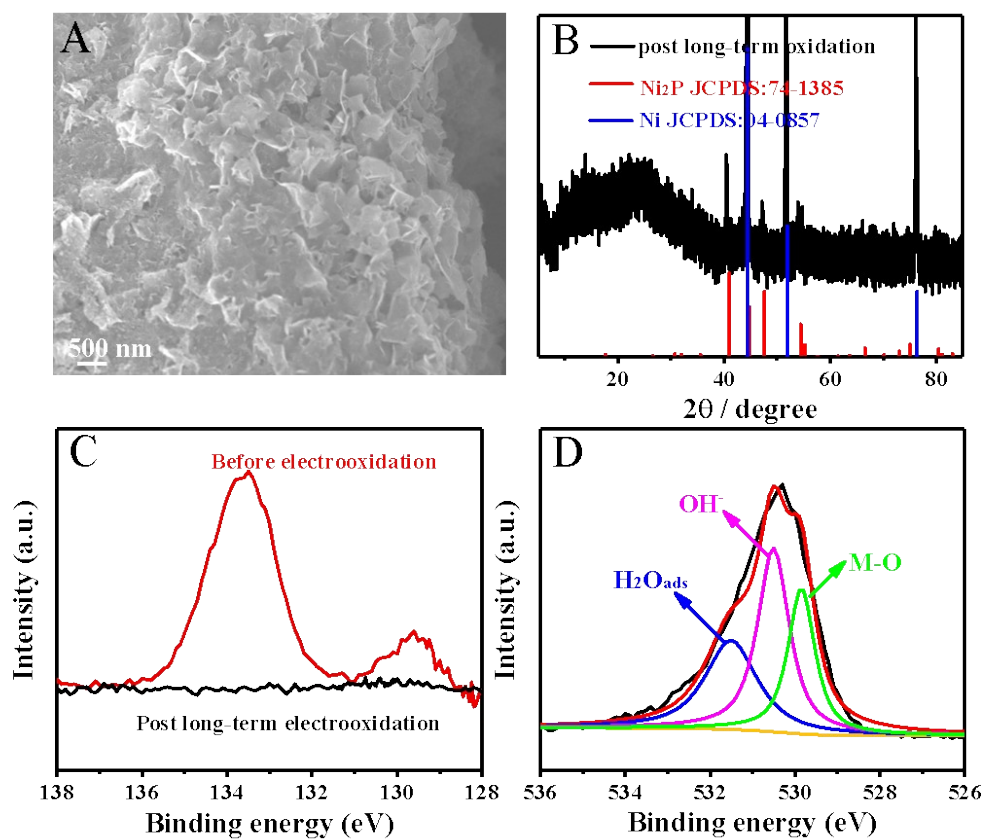

**Fig. S7.** (A) the SEM image, (B) XRD pattern, high-resolution XPS spectra of (C) P 2p and (D) O 1s peaks of the  $\text{Fe}_1\text{Co}_5\text{-Ni}_2\text{P/NF}$  post long-term electrooxidation.

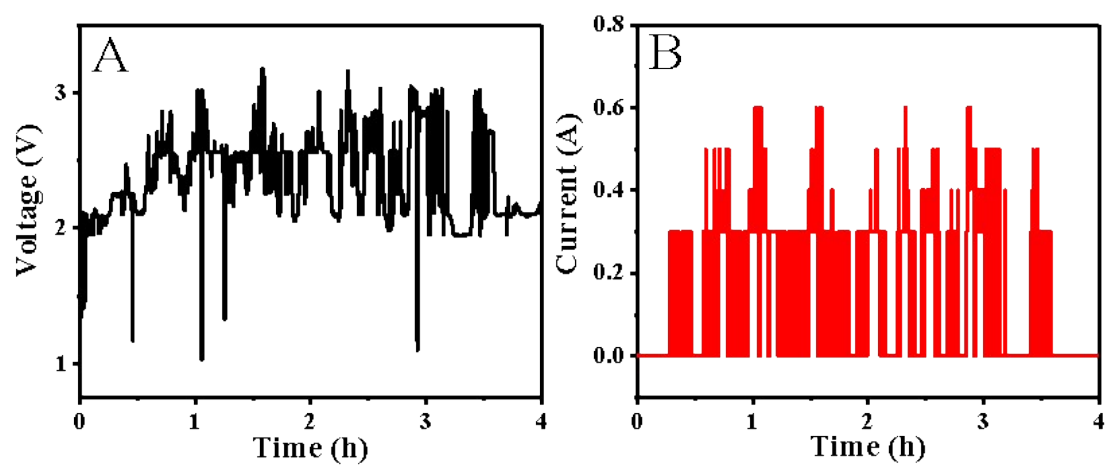

**Fig. S8.** (A) the voltage curve and (B) the current curve of  $\text{Fe}_1\text{Co}_5\text{-Ni}_2\text{P/NF}||\text{Fe}_1\text{Co}_5\text{-Ni}_2\text{P/NF}$  electrolytic cell under 4 hours photovoltaic drive.

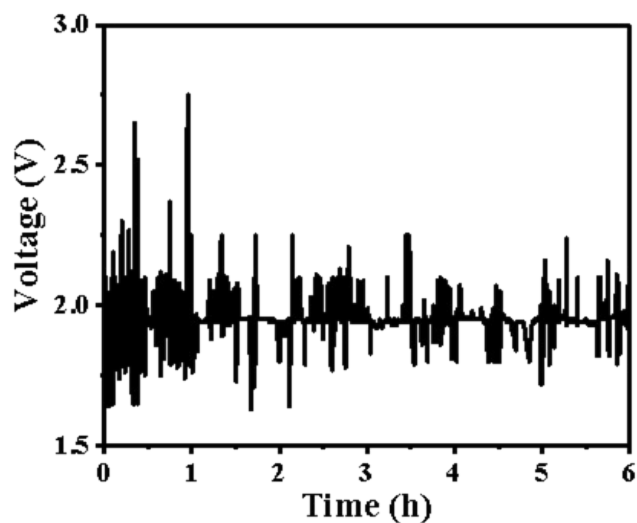

**Fig. S9.** The voltage curve of  $\text{Fe}_1\text{Co}_5\text{-Ni}_2\text{P/NF}||\text{Fe}_1\text{Co}_5\text{-Ni}_2\text{P/NF}$  electrolytic cell under 6 hours photovoltaic drive.

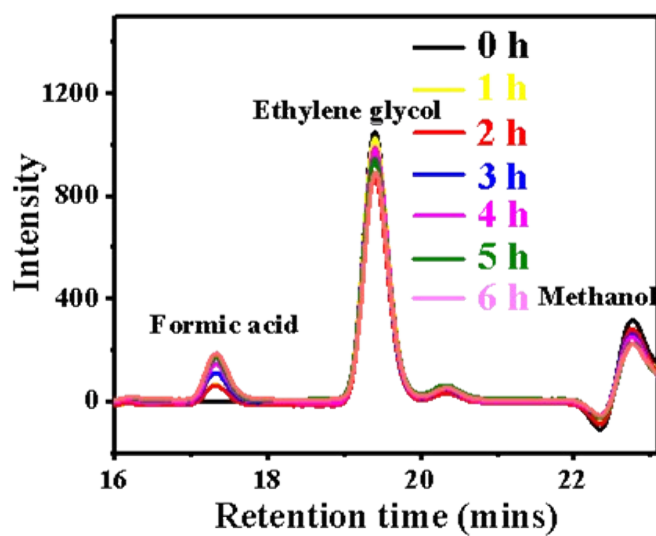

**Fig. S10.** The liquid chromatogram of the product after exposure to sunlight for different periods of time.
